# Supplementary material for: Visualization and understanding of the degradation behaviors of a PEFC Pt/C cathode electrocatalyst using a multi-analysis system combining time-resolved quick XAFS, three-dimensional XAFS-CT, and same-view nano-XAFS/STEM-EDS techniques
Source: Royal Society of Chemistry journal article supplement (doi:10.1039/d0cp01356k), 2020-01-01
Supplement: d0cp01356k1.pdf [file d0cp01356k1.pdf]

## Supporting Information

### Visualization and Understanding of Degradation Behaviors of a PEFC Pt/C Cathode Electrocatalyst by a Multi-Analysis System Combining Time-Resolved Quick XAFS, Three-Dimensional XAFS-CT, and Same-View Nano-XAFS/STEM-EDS Techniques

*Kotaro Higashi,<sup>†</sup> Shinobu Takao,<sup>†</sup> Gabor Samjeské,<sup>†,‡</sup> Hirosuke Matsui,<sup>‡</sup> Mizuki Tada,<sup>‡,§</sup> Tomoya Uruga,<sup>†,¶</sup> and Yasuhiro Iwasawa<sup>†,††\*</sup>*

<sup>†</sup> Innovation Research Center for Fuel Cells, The University of Electro-Communications, Chofu, Tokyo 182-8585, Japan

<sup>‡</sup> Department of Chemistry, Graduate School of Science, Nagoya University, Chikusa, Nagoya, Aichi 464-8602, Japan

<sup>§</sup> Research Center for Materials Science, Nagoya University, Chikusa, Nagoya, Aichi 464-8602, Japan

<sup>¶</sup> JASRI/SPring-8, Sayo-cho, Sayo-gun, Hyogo 679-5198, Japan

<sup>††</sup> Graduate School of Informatics and Engineering, The University of Electro-Communications, Chofu, Tokyo 182-8585, Japan

\*Corresponding author: [iwasawa@pc.uec.ac.jp](mailto:iwasawa@pc.uec.ac.jp)

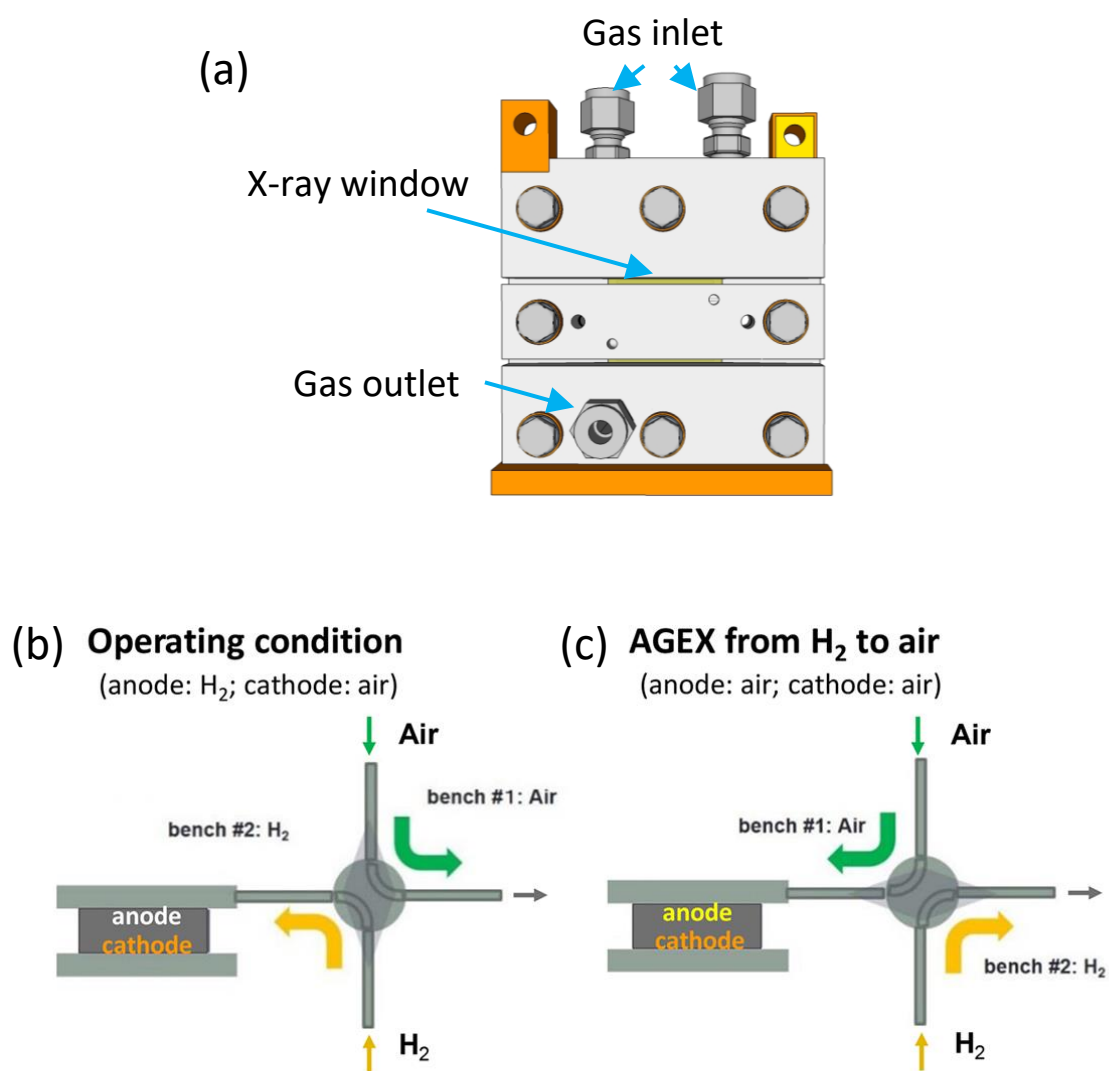

**Figure S1.** (a) Schematic of homemade PEFC single cell for SR X-ray based multi measurements; (b, c) AGEX setup for MEA in PEFC by a four-way valve.

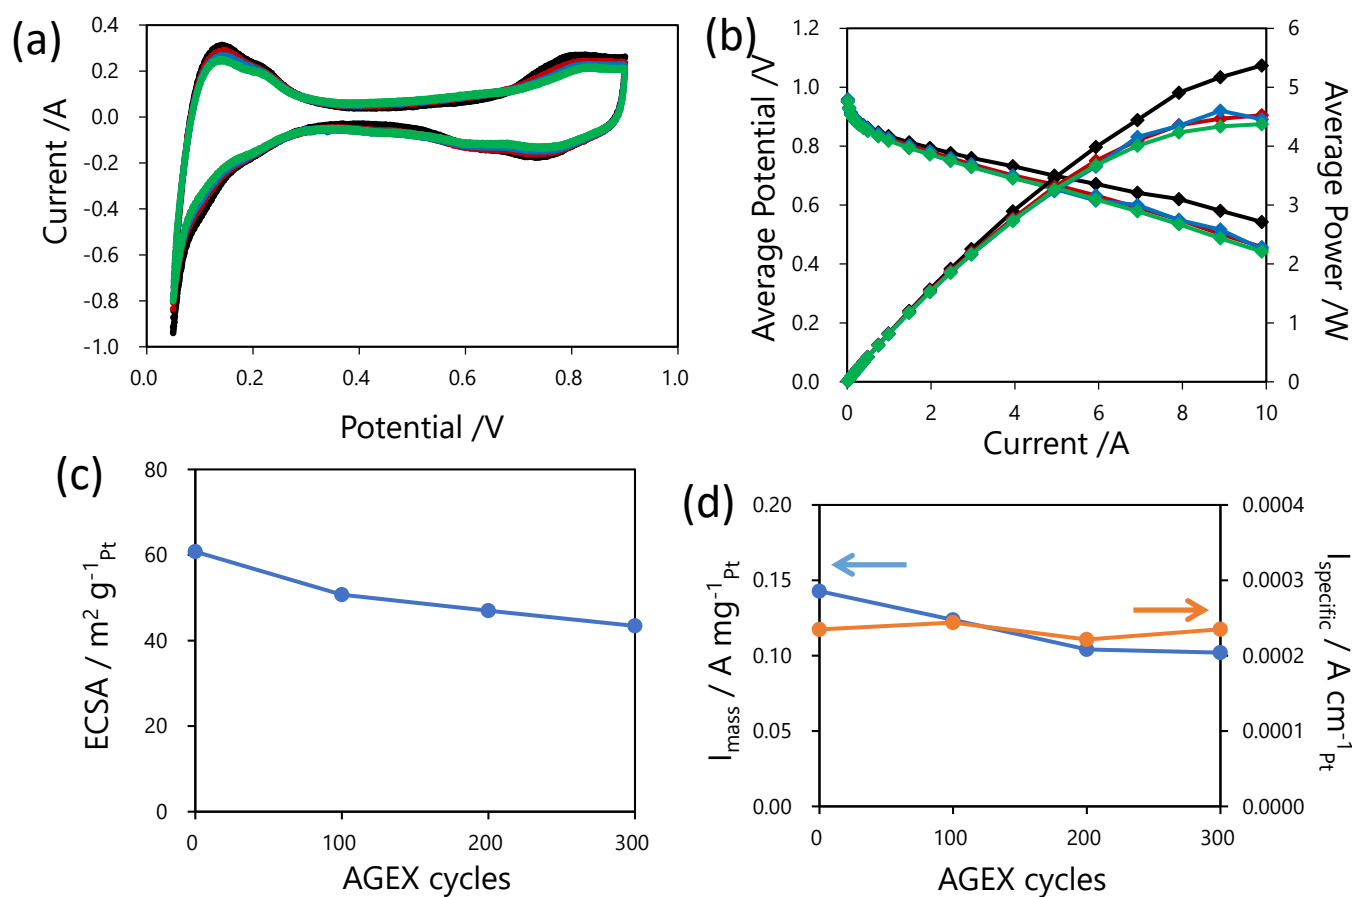

**Figure S2.** Electrochemical data. (a) cyclic voltammograms (CVs), (b) I-V polarization curves, (c) electrochemical active surface areas (ECSA), (d) mass activities (MA) and surface specific activities (SA) of the MEA Pt/C samples after aging (before AGEX) and after 100, 200 and 300 AGEX cycles.

Electrochemical experiments in the AGEX treatments were controlled and monitored using a combination of AUTOLAB302N PGSTAT and BOOSTER20A with NOVA software (Metrohm Autolab B.V.). Cyclic voltammograms (CVs) for the MEAs were conducted between 0.05 and 0.9 V<sub>RHE</sub> at 20 and 50 mV s<sup>-1</sup> in H<sub>2</sub> (anode) and N<sub>2</sub> (cathode) operating atmospheres. The hydrogen adsorption charge determined from the CV (at 50 mV s<sup>-1</sup>) was used to calculate the electrochemical surface area (ECSA) after correction for the double-layer charge in the potential region between 0.05–~0.4 V, assuming 210 μC cm<sup>-2</sup> as hydrogen adsorption charge for polycrystalline Pt. Following the CVs, MEA performances were examined under the galvanostatic conditions by applying stepwise increasing constant currents for 1 min followed by a frequency response analysis (FRA) at 10 mA AC amplitude and 1000 Hz frequency to measure the real part of the fuel-cell impedance to obtain the iR-free cell potentials. Performance tests (MA and SA) were carried out using air as cathode feed gas as described previously. [refs. 48,70] Fuel cell temperature was kept at 80°C and gas humidifier at 78°C, resulting in a relative humidity of about 92% during all experimental procedures. In AGEX, starting from the PEFC operating conditions (H<sub>2</sub>-air) and when the anode H<sub>2</sub> gas was switched to air, which corresponds to the shutdown conditions (air-air).

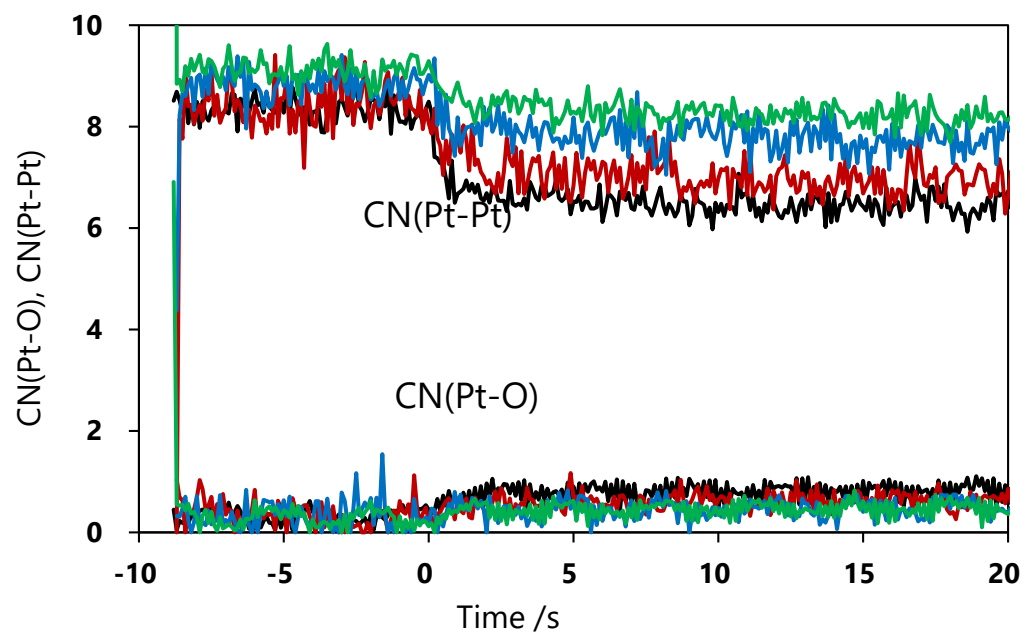

**Figure S3.** Transient response curves of the CN(Pt-O) and CN(Pt-Pt) for the MEA Pt/C cathode catalysts under the voltage operation  $0.4 \rightarrow 1.0 V_{\text{RHE}}$ . black: after aging (before AGEX); red: 100 AGEX cycles; blue: 200 AGEX cycles; green: 300 AGEX cycles; yellow: exponential fit. Under  $\text{H}_2$  (anode)- $\text{N}_2$  (cathode); cell temp.: 353 K, relative humidity: ~93%. Data acquisition: every 100 ms.

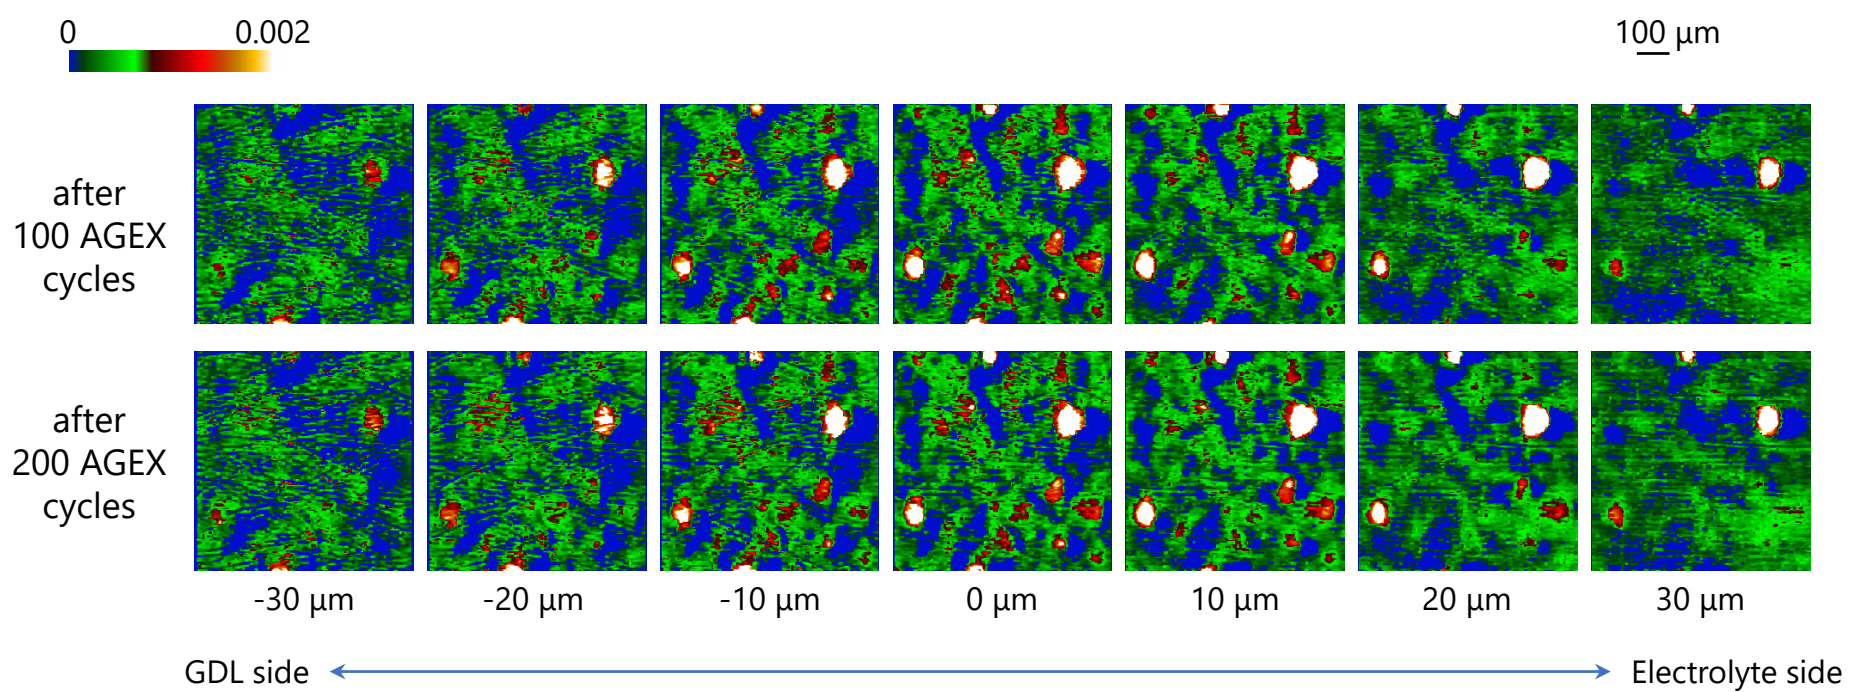

**Figure S4.** Cross-sectional images of Pt amount distribution at each depth of the cathode catalyst layer after 100 and 200 AGEX cycles at a cell potential of  $1.0 V_{\text{RHE}}$ .



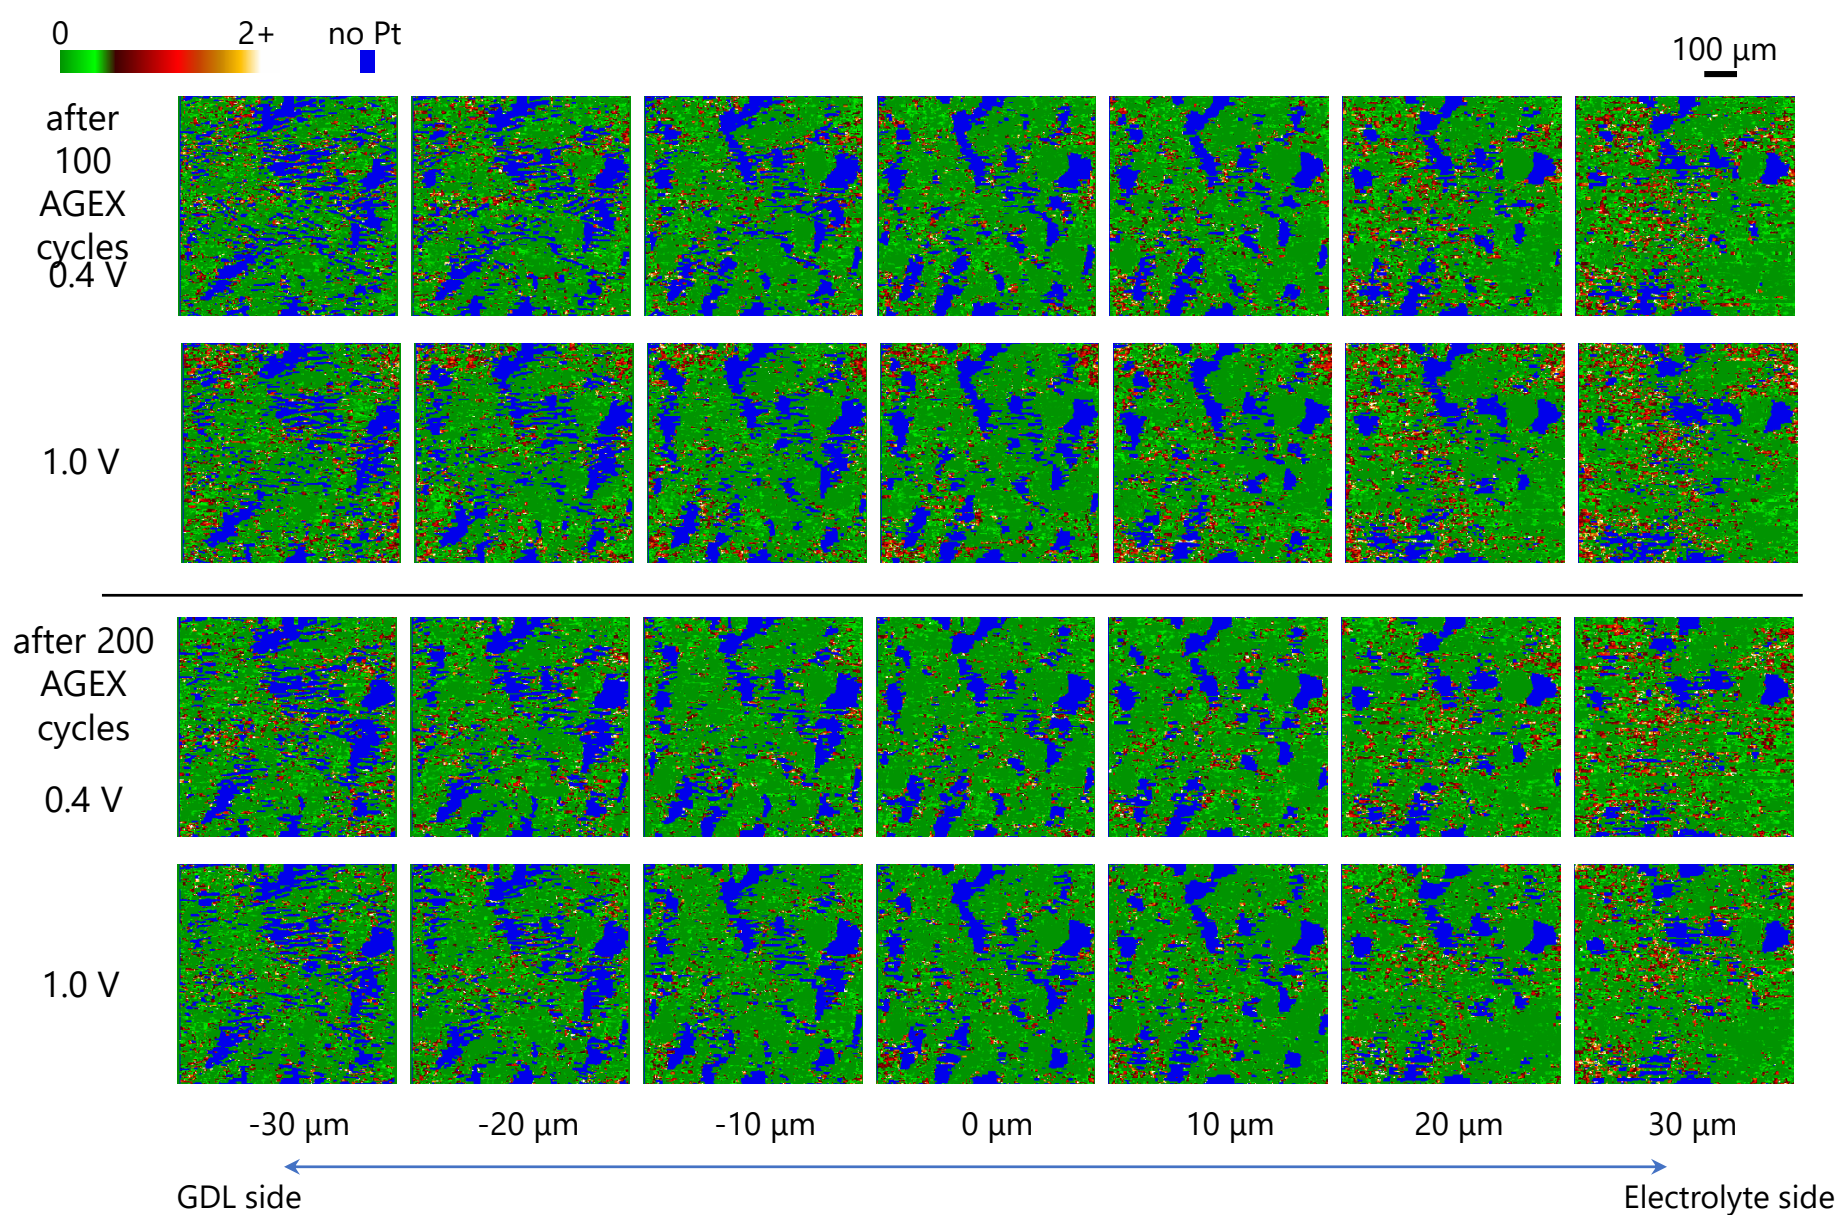

**Figure S5.** Cross-sectional images of Pt valence distribution determined by the white line peak intensity at each depth of the cathode catalyst layer after 100 and 200 AGEX cycles at a cell potential of 0.4 or 1.0  $V_{\text{RHE}}$ .<sup>S6</sup>

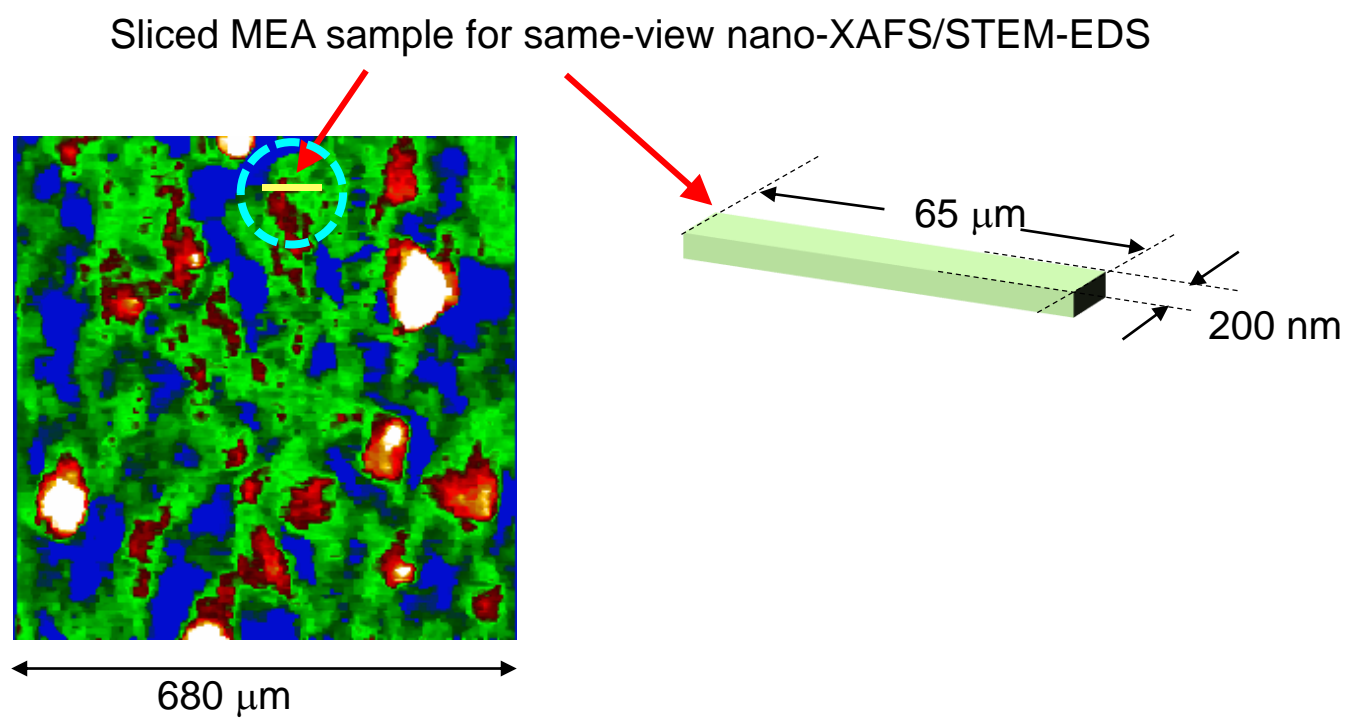

**Figure S6.** A sliced MEA sample area in a cross-sectional Pt-quantity imaging of the cathode catalyst layer after 300 AGEX cycles for same-view nano-XAFS/STEM-EDS.

**Table S1.** Statistics of voids of the MEA Pt/C cathode layer after 300 AGEX cycles in each region in Figure 10.

|                         | Electrolyte boundary area | GDL boundary area | Center area |
|-------------------------|---------------------------|-------------------|-------------|
| Numbers of voids        | 539                       | 316               | 472         |
| Average void sizes / nm | 387                       | 283               | 276         |
| Void fractions / %      | 16.7                      | 5.2               | 7.4         |



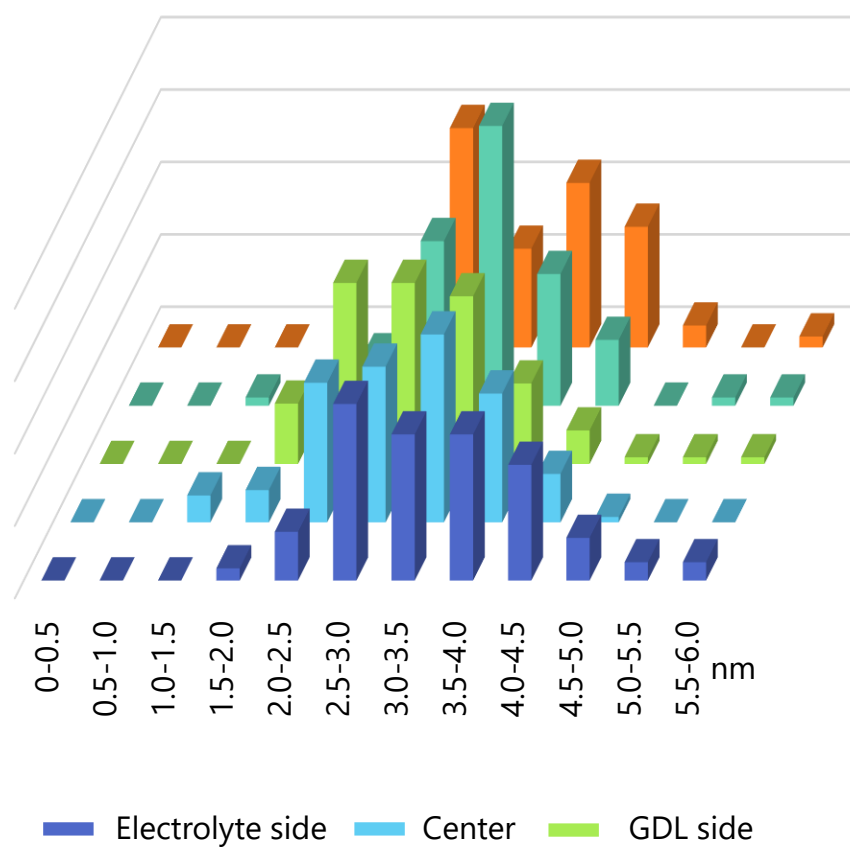

**Figure S7.** Histograms of Pt particle sizes of the MEA Pt/C cathode layer after 300 AGEX cycles by STEM images. Areas up to 5  $\mu\text{m}$  from the electrolyte boundary (blue), GDL boundary (green), and center area (light blue), and areas around voids (blue green) and inside voids (orange).

**Table S2.** Statistics of Pt particle sizes in the MEA Pt/C cathode layer after 300 AGEX cycles in each region in Figure S7.

|                  | Pt particle / nm | C support / nm |
|------------------|------------------|----------------|
| Electrolyte side | 3.5              | 41.0           |
| Center           | 3.0              | 41.2           |
| GDL side         | 2.9              | 40.1           |
| Around void      | 3.3              | 32.0           |
| In void          | 3.3              | -              |
